# Supplementary material for: Diagnostic accuracy and clinical implications of robotic assisted MRI-US fusion guided target saturation biopsy of the prostate
Source: PubMed Central journal article supplement (PMC8511036; doi:10.1038/s41598-021-99854-0), 2021-10-12
Supplement: 41598_2021_99854_MOESM1_ESM.pdf [file 41598_2021_99854_MOESM1_ESM.pdf]

## **Diagnostic accuracy and clinical implications of robotic assisted MRI-US fusion guided target saturation biopsy of the prostate**

Christian Wetterauer<sup>1\*</sup>, Pawel Trotsenko<sup>1\*</sup>, Marc Olivier Matthias<sup>1</sup>, Christian Breit<sup>2</sup>, Nicola Keller<sup>3</sup>, Anja Meyer<sup>1</sup>, Philipp Brantner<sup>2</sup>, Tatjana Vlajnic<sup>4</sup>, Lukas Bubendorf<sup>4</sup>, David Jean Winkel<sup>2</sup>, Maciej Kwiatkowski<sup>5#</sup>, Hans Helge Seifert<sup>1#</sup>

<sup>1</sup> Department of Urology, University Hospital Basel, Basel, Switzerland

<sup>2</sup> Department of Radiology, University Hospital Basel, Basel, Switzerland

<sup>3</sup> University of Basel, Basel, Switzerland

<sup>4</sup> Institute of Medical Genetics and Pathology, University Hospital Basel, University of Basel, Switzerland

<sup>5</sup> Department of Urology, Cantonal Hospital Aarau, Aarau, Switzerland

\*These authors contributed equally to this work

# shared last authorship

### **Corresponding author:**

PD Dr. Christian Wetterauer

Department of Urology

University Hospital Basel

Spitalstrasse 21

4031 Basel, Switzerland

Phone: +41 61 328 71 16

Email: [christian.wetterauer@usb.ch](mailto:christian.wetterauer@usb.ch)

ORCID: 0000-0003-2947-4245

**Supplementary Table 1: Distribution of biopsies – main ISUP of all positive lesions and all patients with at least one positive lesion**

| Parameter           | No cancer | ISUP I    | ISUP II   | ISUP III  | ISUP IV  | ISUP V |
|---------------------|-----------|-----------|-----------|-----------|----------|--------|
| RS - Lesions n=58   |           | n (%)     |           |           |          |        |
| One core            | 21 (36.2) | 16 (27.6) | 9 (15.5)  | 6 (10.3)  | 6 (10.3) | -      |
| Two cores           | 12 (20.7) | 16 (27.6) | 12 (20.7) | 11 (19)   | 7 (12.1) | -      |
| Three cores         | 6 (10.3)  | 14 (24.1) | 18 (31)   | 13 (22.4) | 7 (12.1) | -      |
| Target-saturation   | 0 (0)     | 13 (22.4) | 22 (37.9) | 16 (27.6) | 7 (12.1) | -      |
| RS - Patients n=46  |           | n (%)     |           |           |          |        |
| One core            | 17 (37)   | 11 (23.9) | 8 (19.6)  | 4 (8.7)   | 5 (10.9) | -      |
| Two cores           | 10 (21.7) | 12 (26.1) | 10 (21.7) | 9 (19.6)  | 5 (10.9) | -      |
| Three cores         | 5 (10.9)  | 10 (21.7) | 15 (32.6) | 11 (23.9) | 5 (10.9) | -      |
| Target-saturation   | 0 (0)     | 10 (21.7) | 17 (37)   | 14 (30.4) | 5 (10.9) | -      |
| WCS - Lesions n=58  |           | n (%)     |           |           |          |        |
| One core            | 35 (60.3) | 11 (19)   | 7 (12.1)  | 3 (5.2)   | 2 (3.4)  | -      |
| Two cores           | 26 (44.8) | 15 (25.9) | 10 (17.2) | 4 (24.1)  | 3 (5.2)  | -      |
| Three cores         | 17 (29.3) | 16 (27.6) | 14 (24.1) | 7 (12.1)  | 4 (6.9)  | -      |
| Target-saturation   | 0 (0)     | 13 (22.4) | 22 (37.9) | 16 (27.6) | 7 (12.1) | -      |
| WCS - Patients n=46 |           | n (%)     |           |           |          |        |
| One core            | 28 (60.9) | 7 (15.2)  | 7 (15.2)  | 2 (4.3)   | 2 (4.3)  | -      |
| Two cores           | 21 (45.7) | 10 (21.7) | 10 (21.7) | 2 (4.3)   | 3 (6.5)  | -      |
| Three cores         | 15 (32.6) | 12 (26.1) | 11 (23.9) | 4 (8.7)   | 4 (8.7)  | -      |
| Target-saturation   | 0 (0)     | 10 (21.7) | 17 (37)   | 14 (30.4) | 5 (10.9) | -      |

ISUP: International Society of Urological Pathology grading; RS: random selection; WCS: worst case scenario
